# Supplementary material for: The Spatiotemporal Heterogeneity of Non-communicable Diseases Attributed to Low Physical Activity: Capturing Populations in Vulnerable Regions and Age Groups
Source: Research Square preprint supplement (doi:10.21203/rs.3.rs-8156186/v1), 2025-12-12
Supplement: Supplementary file 1 [file d4048c7509a3e61ee71ec6d8.docx]

**Supplementary Appendix**

# 1.The Burden of Low Physical Activities in 1990 and Its Percentage Change by 2021.

Table S1 The Burden of Low physical activities in 1990 by Global, Super-Regions, SDI, and Different Income Groups.

| Location name | Death | | | DALYs | | |
| --- | --- | --- | --- | --- | --- | --- |
| Number | | percent change% | Number | | percent change% |
| 1990 | 2021 | 1990 | 2021 |
| Global | 333185.1 (143831.32 to 532519.28) | 649308.59 (276348.17 to 1044772.12) | 0.95 (0.76 to 1.16) | 7525493.03 (3438411.26 to 11601423.58) | 15475981.4 (7248984.76 to 23953592.69) | 1.06 (0.88 to 1.26) |
| Low | 11449.73 (4811.29 to 18146.84) | 25267.44 (10639.96 to 39875.66) | 1.21 (0.95 to 1.49) | 303391.26 (133842.08 to 473386.49) | 695012.69 (310434.79 to 1075049.37) | 1.29 (1.05 to 1.56) |
| Low-middle | 43899.97 (19473.92 to 69182.25) | 119794.41 (52630.59 to 191296) | 1.73 (1.38 to 2.12) | 1145798.01 (533554.69 to 1754475.16) | 3066142.93 (1411882.42 to 4764298.87) | 1.68 (1.35 to 2.05) |
| Middle | 76621.2 (33361.96 to 121121.55) | 220433.77 (95234.71 to 352739.08) | 1.88 (1.49 to 2.3) | 1991624.13 (911113.47 to 3041408.86) | 5493578.59 (2561409.32 to 8404361.82) | 1.76 (1.42 to 2.12) |
| High-middle | 92989.08 (36202.75 to 156755.14) | 165811.11 (69043.81 to 274974.67) | 0.78 (0.51 to 1.11) | 1968274.98 (900300.43 to 3098389.82) | 3483913.04 (1558566.32 to 5509733.48) | 0.77 (0.53 to 1.03) |
| High | 107706.95 (46468.17 to 177548.69) | 117268.8 (49149.25 to 191410.55) | 0.09 (-0.07 to 0.29) | 2105145.27 (952207.36 to 3268638.62) | 2719894.01 (1239492.2 to 4198715.57) | 0.29 (0.14 to 0.5) |
| Central Europe, Eastern Europe, and Central Asia | 54361.28 (18871.57 to 94349.84) | 65779.25 (25381.19 to 114016.12) | 0.21 (0 to 0.47) | 1061438.87 (462231.14 to 1713330.17) | 1245368.28 (536296.39 to 1974043.81) | 0.17 (0.01 to 0.37) |
| High-income | 114602.49 (47806.07 to 188210.34) | 117335.88 (49398.44 to 192014.33) | 0.02 (-0.13 to 0.21) | 2202767.14 (997334.65 to 3413468.99) | 2616750.46 (1190714.5 to 4077392.22) | 0.19 (0.06 to 0.39) |
| Latin America and Caribbean | 19276.12 (8665.19 to 30901.91) | 45545.8 (20241.92 to 70603.22) | 1.36 (1.03 to 1.79) | 482658.93 (225085.21 to 751283.81) | 1208928.54 (541643.66 to 1857528.78) | 1.5 (1.19 to 1.89) |
| North Africa and Middle East | 26370.39 (11527.55 to 41728.19) | 60096.5 (26428.1 to 96409.26) | 1.28 (1.02 to 1.57) | 699275.44 (329884.51 to 1070667.89) | 1771238.38 (835733.76 to 2733902.85) | 1.53 (1.24 to 1.84) |
| South Asia | 36813.13 (16042.62 to 58787.27) | 116217.85 (52658.09 to 185983.83) | 2.16 (1.5 to 2.88) | 959169.94 (436683.26 to 1511690.6) | 2785781.3 (1278126.12 to 4389335.21) | 1.9 (1.36 to 2.58) |
| Southeast Asia, East Asia, and Oceania | 70245.54 (29819.35 to 115760.5) | 216436.64 (92213.73 to 366075.14) | 2.08 (1.34 to 2.96) | 1816124 (800033.73 to 2833962.56) | 5080821.8 (2282693.81 to 7996695.8) | 1.8 (1.24 to 2.48) |
| Sub-Saharan Africa | 11516.15 (4857.95 to 18150.54) | 27896.67 (11840.55 to 44219.42) | 1.42 (1.16 to 1.76) | 304058.7 (135422.07 to 465157.62) | 767092.62 (337346.77 to 1163571.92) | 1.52 (1.26 to 1.83) |
| Central Asia | 3495.95 (1372.49 to 5894.07) | 4846.15 (1946.73 to 8286.94) | 0.39 (0.12 to 0.69) | 73040.5 (31717.38 to 114357.63) | 113178.25 (49235.68 to 181908.48) | 0.55 (0.29 to 0.86) |
| Central Europe | 18306.26 (6672.79 to 31239.59) | 21911.36 (8851.2 to 36961.42) | 0.2 (0.02 to 0.46) | 369644.01 (160269.81 to 592833.97) | 429177.5 (195428.72 to 667759.12) | 0.16 (0.02 to 0.34) |
| Eastern Europe | 32559.08 (10823.09 to 57325.58) | 39021.74 (13154.32 to 68779.92) | 0.2 (-0.1 to 0.62) | 618754.37 (254973.31 to 1015940.71) | 703012.54 (287106.25 to 1133648.71) | 0.14 (-0.11 to 0.48) |
| Australasia | 2609.91 (1075.86 to 4326.31) | 3132.71 (1406.12 to 5241.57) | 0.2 (-0.07 to 0.61) | 51203.09 (22664.84 to 80209.05) | 67444.1 (32860.34 to 105179.08) | 0.32 (0.08 to 0.63) |
| High-income Asia Pacific | 12152.09 (4919.59 to 21564.4) | 19250.87 (8315.56 to 32899.33) | 0.58 (0.16 to 1.22) | 322407.56 (146689.99 to 507875.68) | 517545.89 (229151.88 to 811374.47) | 0.61 (0.26 to 1.02) |
| High-income North America | 27321.32 (11513.53 to 48070.28) | 33853.35 (12750.96 to 56181.17) | 0.24 (-0.15 to 0.84) | 514000.54 (225796.43 to 839041.53) | 848804.57 (352795.48 to 1359053.44) | 0.65 (0.24 to 1.21) |
| Southern Latin America | 2443.43 (1007.6 to 4197.71) | 3161.86 (1285 to 5219.07) | 0.29 (-0.06 to 0.85) | 52491.26 (22393.81 to 86109.96) | 75475.41 (33095.88 to 121395.21) | 0.44 (0.11 to 0.94) |
| Western Europe | 70075.74 (28560.83 to 116218.9) | 57937.09 (24688.53 to 95312.67) | -0.17 (-0.3 to -0.01) | 1262664.69 (568534.04 to 2005005.72) | 1107480.49 (521017.49 to 1725703.61) | -0.12 (-0.22 to 0.03) |
| Andean Latin America | 856.85 (365.28 to 1409.63) | 2491.1 (1082.18 to 3944.7) | 1.91 (1.18 to 2.97) | 20120.24 (8656.23 to 32177.02) | 63362.62 (28851.21 to 99881.24) | 2.15 (1.48 to 3.03) |
| Caribbean | 2936.22 (1259.48 to 4705.46) | 5110.49 (2322.29 to 8378.05) | 0.74 (0.45 to 1.09) | 69630.73 (31149.2 to 107442.59) | 136335.52 (62883.68 to 215379.45) | 0.96 (0.67 to 1.25) |
| Central Latin America | 5207.49 (2161.47 to 8194.04) | 15767.87 (7281.48 to 24958.9) | 2.03 (1.39 to 2.81) | 139986.85 (59131.92 to 214114.36) | 441716.46 (195704.84 to 686181.84) | 2.16 (1.6 to 2.8) |
| Tropical Latin America | 10275.56 (4328.49 to 16854.1) | 22176.33 (9573.61 to 35564.71) | 1.16 (0.68 to 1.84) | 252921.11 (115518.16 to 399195.06) | 567513.93 (247987.48 to 887996.16) | 1.24 (0.81 to 1.82) |
| East Asia | 49933.84 (20944.8 to 82881.36) | 152720.28 (59631.5 to 270802.07) | 2.06 (1.03 to 3.29) | 1277762.48 (548742.23 to 2011220.41) | 3375908 (1462201.25 to 5507286.71) | 1.64 (0.93 to 2.58) |
| Oceania | 353.3 (149.05 to 581.96) | 920.88 (381.29 to 1504.48) | 1.61 (1.02 to 2.34) | 11670 (5057.04 to 18675.37) | 32943.16 (13777.34 to 52463.11) | 1.82 (1.19 to 2.55) |
| Southeast Asia | 19958.4 (8473.25 to 32045.09) | 62795.48 (26948.79 to 100297.85) | 2.15 (1.57 to 2.84) | 526691.52 (243143.04 to 825413.72) | 1671970.65 (751294.02 to 2536645.77) | 2.17 (1.64 to 2.78) |
| Central Sub-Saharan Africa | 1492.39 (639.68 to 2472.59) | 3411.33 (1402.22 to 5760.62) | 1.29 (0.63 to 2.04) | 39592.88 (17215.46 to 64500.03) | 95402.36 (39798.43 to 157338.53) | 1.41 (0.75 to 2.2) |
| Eastern Sub-Saharan Africa | 2338.95 (994.74 to 3745) | 5014 (2097.96 to 8427.69) | 1.14 (0.78 to 1.57) | 63195.47 (27352.6 to 99248.01) | 138104.06 (60227.76 to 222451.09) | 1.19 (0.82 to 1.6) |
| Southern Sub-Saharan Africa | 2804.96 (1238.38 to 4455.3) | 8503.02 (3869.3 to 13248.03) | 2.03 (1.56 to 2.58) | 74637.18 (34377.1 to 116037.54) | 222249.36 (100737.47 to 338879.36) | 1.98 (1.52 to 2.5) |
| Western Sub-Saharan Africa | 4879.86 (2014.14 to 7920.38) | 10968.31 (4388.69 to 17855.75) | 1.25 (0.8 to 1.85) | 126633.16 (54974.65 to 197689.92) | 311336.84 (132164.42 to 480516.51) | 1.46 (1 to 2.03) |

# 2.Death and DALYs of low physical activity across 204 countries or territories. (Table S2)

Table S2 Age-standardized rates and numbers of low physical activities burden in 204 countries or territories in 2021.

| Location_name | Death numbers,2021 | | DALYs,2021 | |
| --- | --- | --- | --- | --- |
| Number | ASMR | Number | ASDR |
| Afghanistan | 1759.93 (787.46 to 2866.41) | 22.04 (9.47 to 36.64) | 60734.67 (28410.38 to 97107.96) | 597.38 (283.19 to 955.06) |
| Albania | 241.44 (90.4 to 467.32) | 5.97 (2.11 to 11.63) | 4640.86 (2017.28 to 8243.99) | 108.53 (46.2 to 193.24) |
| Algeria | 3951.79 (1523.26 to 6804.38) | 15.26 (5.52 to 27.25) | 113785.09 (50023.35 to 180922.26) | 342 (144.37 to 556.71) |
| American Samoa | 13.91 (6.42 to 22.11) | 31.29 (14.67 to 50.24) | 498.32 (227.58 to 783.02) | 987.6 (451.87 to 1555.61) |
| Andorra | 7.2 (3.18 to 12.98) | 4.1 (1.85 to 7.27) | 149.6 (68.11 to 252.08) | 93.74 (43.25 to 160.15) |
| Angola | 592.22 (237.09 to 1046.24) | 7.46 (2.74 to 13.26) | 18032.44 (6751.32 to 30851.08) | 170.86 (68.99 to 296.54) |
| Antigua and Barbuda | 10.69 (4.48 to 17.44) | 11.53 (4.77 to 19.07) | 289.35 (119.34 to 460.55) | 279.41 (117.21 to 449.88) |
| Argentina | 2134.82 (851.79 to 3721.6) | 3.65 (1.46 to 6.34) | 48214.9 (21003.92 to 78557.3) | 84.79 (37.1 to 138.62) |
| Armenia | 349.17 (135.12 to 630.15) | 8.11 (3.09 to 14.52) | 6572.83 (2715.52 to 11014.18) | 151.84 (61.95 to 253.01) |
| Australia | 2555.22 (1160.55 to 4255.02) | 4.89 (2.28 to 8) | 56010.09 (26752.48 to 87849.03) | 123.08 (59.13 to 191.53) |
| Austria | 1167.57 (455.43 to 2076.09) | 4.98 (2.04 to 8.75) | 19413.29 (8620.26 to 32370.2) | 95.17 (42.25 to 155.51) |
| Azerbaijan | 672.99 (263.29 to 1167.45) | 9.44 (3.5 to 16.78) | 14656.03 (6077.24 to 25146.7) | 174.1 (70.62 to 294.75) |
| Bahamas | 31.49 (13.5 to 53.43) | 8.87 (3.69 to 15.17) | 972.43 (429.26 to 1613.45) | 242.59 (106.24 to 398.97) |
| Bahrain | 133.23 (57.7 to 209.32) | 29.09 (12.27 to 47.52) | 4570.03 (1986.99 to 7174.09) | 602.69 (259.94 to 947.64) |
| Bangladesh | 7341.25 (2783.45 to 13295.54) | 6.43 (2.19 to 11.85) | 183881.85 (77057.08 to 307049.3) | 140.34 (57.32 to 238.76) |
| Barbados | 89.84 (39.95 to 145.66) | 17.25 (7.63 to 27.96) | 2195.2 (1007.42 to 3441.65) | 431.87 (197.52 to 673) |
| Belarus | 1940.43 (728.7 to 3720.59) | 11.71 (4.49 to 22.46) | 33338.36 (14041.79 to 57827.79) | 203.22 (85.2 to 352.75) |
| Belgium | 1188.72 (492.31 to 2026.47) | 3.96 (1.71 to 6.46) | 24263.99 (11352.83 to 38131.48) | 97.83 (46.09 to 154.3) |
| Belize | 24.26 (10.37 to 39.94) | 9.18 (3.89 to 15.11) | 716.16 (304.07 to 1143.64) | 241.21 (102.2 to 388.26) |
| Benin | 138.01 (45.43 to 261.78) | 3.65 (1.21 to 6.84) | 3524.63 (1374.73 to 6216.46) | 78.58 (29.44 to 143.46) |
| Bermuda | 9.47 (4.21 to 16.18) | 6.09 (2.74 to 10.2) | 208.12 (92.14 to 330.65) | 149.02 (66.54 to 236.21) |
| Bhutan | 89.19 (38.66 to 151.94) | 15.99 (7.01 to 27.45) | 2338.51 (1033.43 to 3707.63) | 386.89 (171.51 to 621.56) |
| Bolivia (Plurinational State of) | 592.38 (233.74 to 998.18) | 7.78 (3.04 to 13.51) | 14770.92 (5736.89 to 25387.72) | 171.65 (66.97 to 292.61) |
| Bosnia and Herzegovina | 643.54 (232.15 to 1205.44) | 9.93 (3.57 to 18.52) | 13869.64 (5706.85 to 23845.71) | 216.18 (89.41 to 370.93) |
| Botswana | 166.29 (71.62 to 269.18) | 14.74 (6.04 to 23.85) | 4617.76 (1947.78 to 7492.23) | 340.83 (146.15 to 547.19) |
| Brazil | 21812.92 (9411.94 to 34989.63) | 9.04 (3.92 to 14.58) | 558672.78 (244356.2 to 875777.09) | 224.03 (98.5 to 351.65) |
| Brunei Darussalam | 26.58 (10.95 to 43.56) | 10.99 (4.33 to 18.39) | 1000.87 (433.31 to 1623.41) | 294.4 (124.76 to 485.06) |
| Bulgaria | 1610.84 (475.45 to 3170.71) | 10.99 (3.2 to 21.61) | 31730.45 (11944.07 to 56154.59) | 220.51 (87.95 to 393.09) |
| Burkina Faso | 327.63 (124.49 to 573.14) | 4.63 (1.63 to 8.33) | 8820.57 (3413.3 to 14733.77) | 104.32 (39.72 to 175.08) |
| Burundi | 140.86 (52.1 to 241.36) | 4.09 (1.49 to 7.61) | 3806.17 (1494.99 to 6447.54) | 87.16 (33.31 to 149.53) |
| Cabo Verde | 20.87 (7.26 to 40.19) | 5.11 (1.73 to 9.8) | 494.12 (202.23 to 857.76) | 114.69 (46.32 to 204.7) |
| Cambodia | 306.13 (102.58 to 595.01) | 3.57 (0.94 to 7.23) | 7591.6 (2773 to 13643.75) | 73.2 (27.69 to 135) |
| Cameroon | 781 (298.53 to 1316.9) | 8.39 (3.05 to 15) | 22240.31 (9072.62 to 37347.29) | 188.54 (75.5 to 314.29) |
| Canada | 1846.3 (656.6 to 3494.06) | 2.17 (0.8 to 4.04) | 40304.55 (15795.03 to 72860.6) | 52.93 (21.02 to 93.12) |
| Central African Republic | 108.21 (43.06 to 189.44) | 7.12 (2.73 to 13.57) | 3674.11 (1502.32 to 6329.74) | 173.59 (72.06 to 302.13) |
| Chad | 258.29 (96.38 to 448.8) | 5.67 (2.13 to 10.46) | 7589.9 (2886.56 to 12728.36) | 137.23 (52.84 to 230.86) |
| Chile | 716.74 (275.42 to 1298.79) | 2.72 (1.04 to 4.9) | 20298.74 (9102.41 to 33551.45) | 78.4 (35.28 to 129.77) |
| China | 147725.7 (56945.8 to 263820.53) | 8.16 (2.93 to 14.92) | 3241988.81 (1377392.22 to 5307582.63) | 161.92 (66.17 to 269) |
| Colombia | 2623.05 (1187.66 to 4281.79) | 4.68 (2.13 to 7.59) | 90712 (41089.74 to 145477.32) | 163.55 (74.33 to 263.14) |
| Comoros | 15.21 (6 to 28.1) | 3.76 (1.37 to 6.97) | 420.1 (161.64 to 724.64) | 89.81 (35.62 to 154.73) |
| Congo | 146.73 (55.05 to 250.76) | 7.21 (2.56 to 13.51) | 4635.8 (1879.32 to 7576.35) | 173.07 (67.26 to 291.46) |
| Cook Islands | 3.46 (1.42 to 5.76) | 13.52 (5.52 to 22.66) | 105.9 (45.55 to 171.69) | 418 (179.9 to 673.91) |
| Costa Rica | 206.43 (87.95 to 347.55) | 3.71 (1.59 to 6.25) | 5945.15 (2579.02 to 9558.56) | 107.78 (46.69 to 172.98) |
| CotedfIvoire | 584.06 (219.22 to 999.36) | 6.98 (2.49 to 12.56) | 17866.1 (7102.64 to 29859.01) | 167.33 (65.17 to 278.25) |
| Croatia | 969.07 (391.79 to 1784.93) | 9.49 (3.91 to 17.44) | 16558.19 (7721.01 to 28704.79) | 170.45 (79.31 to 292.5) |
| Cuba | 1341.68 (546.96 to 2405.78) | 6.38 (2.67 to 11.29) | 31910.97 (14043.8 to 53313.7) | 161.26 (71.66 to 265.9) |
| Cyprus | 147.34 (59.92 to 248.31) | 8.85 (3.55 to 15.16) | 2958.1 (1249.87 to 4926.69) | 155 (64 to 257.19) |
| Czechia | 2174.1 (885.33 to 3630.15) | 9.07 (3.69 to 15.03) | 42040.06 (19377.62 to 66648.36) | 182.93 (84.74 to 290.88) |
| Democratic People's Republic of Korea | 2214.13 (913.91 to 3945.17) | 7.61 (2.98 to 13.94) | 57004.23 (24803.3 to 95979.79) | 178.75 (79.16 to 306.31) |
| Democratic Republic of the Congo | 2488.17 (968.1 to 4314.68) | 10.16 (4.01 to 18.43) | 67018.41 (26577.96 to 112554.86) | 215.36 (89.1 to 362.45) |
| Denmark | 676.8 (291.49 to 1156.47) | 4.84 (2.09 to 8.24) | 11975.32 (5422.71 to 19588.67) | 94.1 (44.21 to 151.45) |
| Djibouti | 19.37 (7.61 to 34.82) | 4.7 (1.65 to 8.75) | 554.83 (222.61 to 956.41) | 99.58 (39.13 to 173.43) |
| Dominica | 8.71 (3.54 to 14.88) | 11.62 (4.75 to 20.05) | 195.56 (81.06 to 324.66) | 244.78 (101.11 to 404.97) |
| Dominican Republic | 754.51 (314.69 to 1275.49) | 7.82 (3.24 to 13.27) | 22148.6 (9564.01 to 35681.53) | 221.53 (96.76 to 357.86) |
| Ecuador | 616.64 (246.44 to 1096.2) | 4.03 (1.59 to 7.16) | 18010.34 (7243.15 to 29847.62) | 111.21 (44.7 to 183.06) |
| Egypt | 10735.29 (4547.8 to 17447.22) | 23.75 (9.37 to 40.98) | 305563.69 (134985.21 to 490904.35) | 519.04 (221.32 to 830.74) |
| El Salvador | 399.49 (150.34 to 696.81) | 6.08 (2.32 to 10.48) | 9678.61 (3892.31 to 16574.13) | 155.38 (62.59 to 265.09) |
| Equatorial Guinea | 34.46 (12.6 to 59.46) | 9.6 (3.35 to 16.83) | 974.09 (375.54 to 1727.55) | 209.23 (80.06 to 356.15) |
| Eritrea | 47.77 (18.59 to 86.97) | 2.59 (0.96 to 4.97) | 1402.05 (552.86 to 2505.95) | 57.06 (22.53 to 104.28) |
| Estonia | 185.34 (77.06 to 337.11) | 5.44 (2.28 to 9.65) | 3196.72 (1381.34 to 5345.64) | 105.33 (44.22 to 173.31) |
| Eswatini | 73.22 (28.4 to 128.03) | 16.83 (6.83 to 29.33) | 2053.33 (812.08 to 3455.83) | 390.17 (155.58 to 664.22) |
| Ethiopia | 1375.21 (545.46 to 2398.59) | 3.91 (1.57 to 7.19) | 37346.39 (14720.8 to 62821.06) | 89.58 (34.88 to 152.33) |
| Fiji | 207.3 (92.58 to 344.7) | 31.67 (14.28 to 53.15) | 6389.26 (2749.51 to 10578.52) | 807.59 (354.16 to 1308.77) |
| Finland | 671.41 (267.34 to 1187.02) | 4.1 (1.68 to 7.14) | 13095.94 (5638.58 to 21410.94) | 95.86 (42.22 to 153.12) |
| France | 7851.42 (3332.91 to 13210.39) | 4.04 (1.76 to 6.58) | 135571.93 (62796.55 to 214788.93) | 87.74 (41.09 to 137.41) |
| Gabon | 41.55 (15.67 to 74.25) | 5.75 (2.07 to 10.68) | 1067.51 (414.89 to 1846.76) | 116.97 (45.56 to 208.09) |
| Gambia | 48.52 (17.11 to 92.41) | 6.24 (2.1 to 12.26) | 1295.06 (530.6 to 2240.12) | 139.89 (53.56 to 251.16) |
| Georgia | 520.39 (126.91 to 998.49) | 7.98 (2.27 to 15.03) | 10300.6 (3803.72 to 18036.14) | 167.15 (65.2 to 282.69) |
| Germany | 10377.54 (4126.09 to 18661.72) | 4.16 (1.69 to 7.33) | 182667.5 (75978.13 to 314223.84) | 85.52 (35.27 to 143.14) |
| Ghana | 1179.97 (465.15 to 1977.31) | 9.48 (3.51 to 16.59) | 34189.06 (14080.62 to 55874.42) | 213.77 (85.8 to 353.05) |
| Greece | 1601.82 (557.97 to 3078.23) | 4.73 (1.8 to 8.65) | 26764.87 (10579.92 to 46856.95) | 96.53 (41.1 to 161.74) |
| Greenland | 2.18 (0.89 to 3.72) | 4.47 (1.66 to 8.39) | 56.8 (24.65 to 92.02) | 93.45 (38.75 to 157.55) |
| Grenada | 13.29 (5.56 to 21.66) | 14.17 (6.07 to 23.91) | 354.82 (147.81 to 583.39) | 328.03 (140.02 to 530.46) |
| Guam | 7.72 (3.23 to 12.83) | 3.53 (1.49 to 5.81) | 256.78 (110.53 to 426.38) | 122 (52.92 to 202.69) |
| Guatemala | 424.24 (167.87 to 769.48) | 4.47 (1.7 to 8.23) | 10989.11 (4065.25 to 18401) | 104.04 (39.36 to 176.11) |
| Guinea | 192.66 (71.74 to 362.49) | 4.31 (1.5 to 8.4) | 4894.01 (1941.76 to 8415.21) | 93.19 (35.97 to 168.98) |
| Guinea-Bissau | 52.39 (20.45 to 86.6) | 10.21 (3.78 to 18.41) | 1615.22 (629.14 to 2646.34) | 235.51 (92.83 to 395.06) |
| Guyana | 85.97 (35.01 to 145.64) | 15.75 (6.32 to 26.73) | 2648.38 (1099.39 to 4299.02) | 418.82 (173.15 to 667.94) |
| Haiti | 949.09 (399.51 to 1691.91) | 16.95 (6.6 to 30.43) | 28359.04 (11281.01 to 48084.21) | 410.59 (169.69 to 701.35) |
| Honduras | 314.24 (125.99 to 556.18) | 6.02 (2.26 to 11.4) | 9231.57 (3798.73 to 15560.12) | 151.2 (64.02 to 253.49) |
| Hungary | 1942.22 (754.5 to 3334.87) | 8.8 (3.44 to 15.16) | 36782.38 (15748.82 to 59780.96) | 177.58 (76.31 to 294.04) |
| Iceland | 24.74 (9.93 to 44.31) | 3.56 (1.46 to 6.25) | 507.68 (219.59 to 836.91) | 83.77 (37.34 to 135.69) |
| India | 97782.63 (45267.12 to 155348.67) | 10.05 (4.4 to 16.1) | 2280872.21 (1060151.11 to 3611754.13) | 206.44 (95.14 to 329.41) |
| Indonesia | 42167.36 (17898.76 to 67722.21) | 23.78 (9.4 to 39.17) | 1112968.24 (492056.53 to 1721275.81) | 510.45 (220.34 to 799.76) |
| Iran (Islamic Republic of) | 6679.11 (2938 to 10953.78) | 9.86 (4.15 to 16.62) | 192443.21 (88294.8 to 303474.47) | 250.33 (116 to 397.4) |
| Iraq | 4593.12 (1853.85 to 7426) | 23.85 (9.26 to 40.74) | 153671.48 (71051.54 to 241161.36) | 628.17 (270.34 to 1011) |
| Ireland | 426.91 (185.52 to 747.16) | 4.95 (2.18 to 8.61) | 8610.85 (3951.84 to 13940.38) | 105.82 (48.93 to 170.37) |
| Israel | 695.97 (288.26 to 1211.52) | 4.9 (2.06 to 8.43) | 13854.52 (5777.06 to 22492.39) | 107.14 (44.06 to 171.83) |
| Italy | 10762.6 (4439.68 to 19069.68) | 5.42 (2.27 to 9.22) | 186304.85 (82237.29 to 306213.06) | 115.39 (51.68 to 182.88) |
| Jamaica | 500.64 (208.75 to 840.21) | 15.41 (6.65 to 25.59) | 11757.52 (5453.61 to 18550.02) | 378.15 (176.73 to 595.13) |
| Japan | 15260.01 (6630.67 to 26329.6) | 3.12 (1.41 to 5.15) | 384916.91 (172521.88 to 619544.78) | 117.41 (53.39 to 181.63) |
| Jordan | 641.31 (263.08 to 1087.07) | 11.79 (4.55 to 20.41) | 22463.34 (8972.43 to 36315.52) | 314.42 (125.5 to 510.11) |
| Kazakhstan | 1167.66 (427.3 to 2203.9) | 8.39 (2.66 to 16.59) | 30508.85 (12853.53 to 51783.49) | 183.69 (75.7 to 316.53) |
| Kenya | 906.04 (366.29 to 1550.31) | 5.12 (1.93 to 9.33) | 26079.79 (10736.31 to 43376.17) | 116.86 (48.74 to 196.62) |
| Kiribati | 21.37 (8.96 to 35.46) | 33.45 (13.91 to 54.27) | 744.78 (315.93 to 1233.26) | 942.62 (396.24 to 1550.25) |
| Kuwait | 280.91 (128.27 to 446.6) | 11.24 (5 to 18.01) | 14771.39 (7002.17 to 23053.78) | 412.23 (188.21 to 642.1) |
| Kyrgyzstan | 314.76 (129.18 to 584.04) | 9.05 (3.53 to 16.84) | 6784.94 (2919.51 to 11398.4) | 166.12 (72.04 to 285.43) |
| Lao People's Democratic Republic | 176.2 (66.78 to 323.94) | 4.93 (1.74 to 9.22) | 4960.83 (2036.83 to 8913.64) | 116.81 (46.13 to 212.69) |
| Latvia | 348.24 (107.01 to 655.4) | 7.51 (2.54 to 13.86) | 6711.98 (2792.01 to 11563.61) | 162.4 (69.15 to 271.66) |
| Lebanon | 617.95 (245.91 to 1100.58) | 9.42 (3.76 to 16.68) | 16874.3 (7226.14 to 27998.66) | 274.28 (116.47 to 452.4) |
| Lesotho | 66.64 (25.8 to 125.73) | 9.08 (3.31 to 17.26) | 1469.78 (577.25 to 2680.64) | 168.67 (64.59 to 307.24) |
| Liberia | 172.54 (72.55 to 290.61) | 9.97 (3.99 to 17.26) | 5647.78 (2419.5 to 9360.28) | 253.55 (107.93 to 424.98) |
| Libya | 646.86 (292.17 to 1064.19) | 14.5 (6.21 to 24.22) | 21012.68 (9258.53 to 33505.88) | 389.16 (170.29 to 621.17) |
| Lithuania | 755.28 (278.3 to 1401.55) | 10.81 (4.2 to 19.89) | 12602.64 (5523.88 to 22065.7) | 200.68 (88.85 to 341.09) |
| Luxembourg | 48.49 (18.49 to 85.18) | 3.9 (1.56 to 6.73) | 933.86 (413.43 to 1537.53) | 83.3 (36.64 to 135.69) |
| Madagascar | 312.34 (123.25 to 547.48) | 4.1 (1.4 to 7.75) | 9277.66 (3869.26 to 16150.12) | 91.04 (35.39 to 159.13) |
| Malawi | 231.59 (95.24 to 402.62) | 3.97 (1.57 to 7.16) | 6072.55 (2529.63 to 10267.97) | 87.97 (36.89 to 152.31) |
| Malaysia | 2419.76 (1040.71 to 3923.42) | 9.58 (4.15 to 15.94) | 76326.12 (33794.58 to 118967.95) | 270.2 (119.26 to 423.66) |
| Maldives | 32.69 (13.59 to 54.39) | 11.71 (4.71 to 19.58) | 1045.57 (451.63 to 1630.79) | 314.06 (136.66 to 492.07) |
| Mali | 471.72 (194.18 to 825.16) | 6.83 (2.65 to 12) | 15679.63 (6546.6 to 26421.17) | 184.58 (76.83 to 312.98) |
| Malta | 79.25 (32.21 to 132.24) | 6.98 (2.86 to 11.55) | 1626.18 (742.54 to 2578.47) | 163 (75.23 to 259.53) |
| Marshall Islands | 16.39 (7.18 to 26.31) | 50.14 (21.81 to 79.7) | 639.22 (281.5 to 1001.09) | 1553.22 (689.15 to 2427.66) |
| Mauritania | 235.43 (91.3 to 399.96) | 12.59 (4.73 to 21.85) | 6426.54 (2781.89 to 10448.66) | 299.47 (126.43 to 490.93) |
| Mauritius | 225.15 (97.12 to 369.68) | 12.82 (5.41 to 21.16) | 5890.48 (2539.83 to 9584.39) | 318.13 (136.93 to 514.2) |
| Mexico | 9644.96 (4103.33 to 15532.81) | 8.28 (3.47 to 13.49) | 258622.01 (111085.92 to 416808.57) | 206.18 (89.15 to 332.14) |
| Micronesia (Federated States of) | 29.26 (12.44 to 46.9) | 43.2 (18.36 to 68.62) | 1019.87 (448.5 to 1619.12) | 1246.03 (540.72 to 1949.24) |
| Monaco | 6.72 (2.47 to 12.18) | 5.5 (2.06 to 9.54) | 123.3 (50.28 to 204.03) | 120.46 (51.69 to 193.99) |
| Mongolia | 47.37 (19.15 to 83.92) | 3.15 (1.19 to 6) | 1312.88 (562.87 to 2210.23) | 65.93 (27.61 to 114) |
| Montenegro | 87.52 (31.82 to 156.66) | 10.39 (3.6 to 19.09) | 1793.86 (755.3 to 3007.47) | 193.1 (80.44 to 325.97) |
| Morocco | 5645.27 (2339.54 to 9265.63) | 19.04 (7.58 to 32.24) | 166193.4 (72762.26 to 255238.42) | 489.42 (213.06 to 768.35) |
| Mozambique | 386.62 (138.51 to 709.56) | 4.73 (1.53 to 8.86) | 10704.48 (4063.51 to 18809.58) | 104.98 (38.76 to 185.63) |
| Myanmar | 1582.56 (558.92 to 2901.84) | 3.87 (1.31 to 7.53) | 43606.15 (16678.62 to 76052.69) | 94.58 (34.73 to 162.13) |
| Namibia | 144.99 (57.53 to 255.08) | 13.42 (5.01 to 23.94) | 3750.28 (1582.41 to 6361.25) | 293.81 (120.05 to 505.7) |
| Nauru | 1.33 (0.54 to 2.28) | 25.97 (10.67 to 43.96) | 46.61 (19.03 to 78.96) | 735.85 (300.23 to 1225.72) |
| Nepal | 980.86 (391.98 to 1743.69) | 5.22 (1.93 to 9.61) | 26108.55 (10727.6 to 46057.84) | 119.49 (49.32 to 210.9) |
| Netherlands | 1391.11 (558.55 to 2525.94) | 3.44 (1.41 to 6.19) | 26233.7 (11137.85 to 43729.87) | 70.51 (30.22 to 115.31) |
| New Zealand | 577.48 (240.64 to 1012.12) | 6.16 (2.58 to 10.77) | 11434.01 (5252.64 to 19239.48) | 131.41 (61.04 to 218.04) |
| Nicaragua | 189.58 (72.31 to 339.05) | 4.42 (1.67 to 8.15) | 6075.56 (2430.29 to 10785.94) | 126.22 (50.24 to 223.58) |
| Niger | 308.73 (122.52 to 550.43) | 5.13 (2.03 to 9.19) | 9612.89 (3803.65 to 16486.51) | 124.56 (50.27 to 216.12) |
| Nigeria | 5243.83 (1933.36 to 8832.11) | 7.6 (2.66 to 12.99) | 144372.26 (56829.37 to 234207.2) | 168.16 (63.61 to 277.61) |
| Niue | 0.41 (0.17 to 0.67) | 19.46 (7.83 to 32.47) | 11.45 (4.88 to 18.33) | 531.78 (228.64 to 849.32) |
| North Macedonia | 385.5 (110.53 to 744.11) | 15.69 (2.88 to 33.46) | 8306.96 (3145.26 to 14575.19) | 280.51 (90.74 to 516.99) |
| Northern Mariana Islands | 5.08 (2.27 to 8.01) | 11.8 (5.17 to 19.18) | 173.35 (77.48 to 272.98) | 318.54 (145.65 to 498.47) |
| Norway | 493.03 (204.35 to 873.2) | 4.05 (1.72 to 7.04) | 9510.15 (4288.18 to 15573.11) | 89.46 (41.37 to 141.4) |
| Oman | 220.72 (89.42 to 369.48) | 16.49 (6.52 to 27.78) | 7270.35 (3276.38 to 11515.22) | 376.2 (161.21 to 615.52) |
| Pakistan | 10023.92 (4206.22 to 16698.14) | 10.42 (4.25 to 17.53) | 292580.19 (126052.54 to 471454.39) | 249.79 (105.78 to 408.89) |
| Palau | 3.27 (1.38 to 5.39) | 17.97 (7.3 to 30.4) | 112.14 (48.12 to 184.42) | 486.26 (204.81 to 800.65) |
| Palestine | 370 (154.28 to 596.18) | 20.17 (8.41 to 34.95) | 10671.62 (4791.22 to 16437.88) | 446.67 (193.13 to 707.14) |
| Panama | 193.24 (76.99 to 337.43) | 4.25 (1.71 to 7.34) | 5173.35 (2268.81 to 8551.5) | 116.39 (51.07 to 192.16) |
| Papua New Guinea | 455.83 (171.67 to 788.59) | 10.33 (3.76 to 18.11) | 17668.8 (6865.44 to 29845.19) | 308.7 (119.89 to 516.99) |
| Paraguay | 363.41 (133.95 to 637.6) | 6.81 (2.49 to 11.99) | 8841.16 (3510.68 to 14996.71) | 156.34 (60.87 to 269.14) |
| Peru | 1282.08 (549.29 to 2219.57) | 3.87 (1.66 to 6.68) | 30581.36 (13880.92 to 51248.56) | 91.86 (41.65 to 153.97) |
| Philippines | 4025.86 (1654.3 to 6836.73) | 5.98 (2.39 to 10.38) | 109636.09 (47534.75 to 178537.97) | 140.18 (59.99 to 233.84) |
| Poland | 6911.7 (3024.26 to 11819.47) | 8.75 (3.88 to 14.81) | 139383.32 (64638 to 219648.07) | 186.56 (86.33 to 292.42) |
| Portugal | 1866.64 (730.03 to 3285.24) | 5.88 (2.47 to 9.91) | 36532.63 (16171.2 to 58414.54) | 139.14 (62.36 to 215.13) |
| Puerto Rico | 614.49 (262.85 to 1010.25) | 7.1 (3.07 to 11.6) | 14985.73 (6439.37 to 24330.96) | 210.36 (91.55 to 337.9) |
| Qatar | 91.1 (39.38 to 151.36) | 20.4 (8.4 to 34.16) | 4603.79 (2009.99 to 7532.71) | 496.17 (206.18 to 803.27) |
| Republic of Korea | 3781.14 (1514.54 to 6783.02) | 4.13 (1.65 to 7.43) | 123609.71 (54377.13 to 204160.12) | 134.6 (59.69 to 220.89) |
| Republic of Moldova | 507.71 (187.8 to 902.5) | 8.33 (3.11 to 14.71) | 10339.92 (4050.04 to 17116.89) | 170.89 (66.61 to 282.48) |
| Romania | 3625.19 (1091.5 to 6893.41) | 8.72 (2.75 to 16.19) | 70179.32 (28057.88 to 117217.9) | 180.3 (72.14 to 298.74) |
| Russian Federation | 28025.41 (8803.75 to 50214.12) | 11.45 (3.69 to 20.32) | 510093.82 (207163.81 to 846035) | 208.54 (85.87 to 344.22) |
| Rwanda | 175.85 (62.61 to 337.23) | 3.96 (1.39 to 7.68) | 4483.75 (1693.68 to 8419.19) | 80.67 (29.49 to 149.18) |
| Saint Kitts and Nevis | 6.94 (2.62 to 11.61) | 13.17 (4.64 to 22.41) | 196.2 (83 to 324.96) | 304.47 (124.65 to 492.63) |
| Saint Lucia | 24.12 (9.11 to 41.03) | 10.51 (3.94 to 18.06) | 636.51 (270.75 to 1042.95) | 267.58 (113.79 to 436.71) |
| Saint Vincent and the Grenadines | 16.47 (6.85 to 28.36) | 12.86 (5.3 to 22.11) | 431.75 (184.46 to 706.25) | 310.6 (132.38 to 511.04) |
| Samoa | 30.74 (13.76 to 50.15) | 23.1 (10.06 to 37.61) | 1036.97 (463.79 to 1651.8) | 687.82 (306.13 to 1104.46) |
| San Marino | 2.77 (1.03 to 5.49) | 2.69 (1.04 to 5.05) | 59.14 (24.52 to 103.32) | 74.66 (32.36 to 124.57) |
| Sao Tome and Principe | 3.63 (1.27 to 6.49) | 4.31 (1.38 to 8.32) | 105.37 (43.68 to 174.68) | 100.89 (39.9 to 173.73) |
| Saudi Arabia | 2653.35 (1144.44 to 4236.17) | 18.33 (7.59 to 30.18) | 101433.71 (43597.36 to 158916.4) | 465.1 (200.8 to 737.61) |
| Senegal | 602.67 (237.49 to 1044.85) | 9.39 (3.6 to 16.67) | 17360.39 (7578.75 to 28733.11) | 232.21 (100.39 to 392.38) |
| Serbia | 2068.61 (626.78 to 4027.37) | 11.72 (3.55 to 22.85) | 39592.4 (14806.34 to 70931.43) | 228.86 (86.07 to 406.75) |
| Seychelles | 8.09 (3.32 to 13.59) | 8.42 (3.36 to 14.36) | 231.82 (100.99 to 376.82) | 213.99 (92.99 to 347.04) |
| Sierra Leone | 217.17 (85.46 to 388.81) | 7.17 (2.62 to 13.02) | 6152.09 (2582.91 to 10537.06) | 168.93 (69.99 to 297.41) |
| Singapore | 183.15 (85.11 to 297.74) | 2.2 (1.02 to 3.62) | 8018.41 (3618.47 to 13018.11) | 92.83 (42.15 to 150.6) |
| Slovakia | 724.18 (286.24 to 1293.74) | 7.59 (2.97 to 13.67) | 13951.38 (5763.3 to 23264.36) | 144.99 (59.34 to 241.1) |
| Slovenia | 208.53 (78.93 to 385.48) | 3.8 (1.46 to 6.83) | 4101.86 (1702.93 to 6933.52) | 85.06 (36.23 to 141.9) |
| Solomon Islands | 61.6 (26.02 to 100.89) | 20.18 (8.52 to 33.67) | 2102.99 (881.02 to 3379.23) | 553.73 (235.66 to 890.24) |
| Somalia | 181.23 (66 to 315.81) | 4.5 (1.64 to 8.31) | 5406.06 (2004.93 to 9344.96) | 100.07 (39.77 to 175.49) |
| South Africa | 7563.89 (3450.88 to 11897.77) | 19.49 (8.43 to 31.22) | 197226.38 (89503.02 to 303108.95) | 443.19 (195.43 to 686.75) |
| South Sudan | 126.06 (47.48 to 219.14) | 4.53 (1.61 to 8.14) | 3375.06 (1287.29 to 5926.64) | 97.02 (36.75 to 167.37) |
| Spain | 5299.57 (2227.19 to 9088.33) | 4.04 (1.77 to 6.65) | 116200.4 (52541.93 to 187902.37) | 110.99 (51.25 to 175.1) |
| Sri Lanka | 1035.3 (337.42 to 1961.99) | 4.24 (1.33 to 8.47) | 31625.92 (12626.75 to 54648.99) | 118.26 (47.66 to 203.57) |
| Sudan | 5557.14 (2586.43 to 9296.14) | 29.92 (13.5 to 51.46) | 187958.95 (92476 to 303788.13) | 844.34 (405.41 to 1367.75) |
| Suriname | 63 (28.05 to 104.29) | 10.38 (4.46 to 17.19) | 2144.18 (948.64 to 3413.81) | 333.6 (146.81 to 528.43) |
| Sweden | 937.57 (401.62 to 1621.23) | 3.4 (1.47 to 5.77) | 17842.54 (7901.34 to 28718.87) | 78.48 (34.89 to 125.45) |
| Switzerland | 747.08 (289.1 to 1339.67) | 3.1 (1.22 to 5.34) | 16343.16 (6834.05 to 26898.64) | 84.43 (36.28 to 135.95) |
| Syrian Arab Republic | 1910.92 (829.31 to 3381.46) | 19.26 (8.22 to 34.68) | 52923.4 (23867.15 to 87215.08) | 426.35 (192.7 to 716.92) |
| Taiwan (Province of China) | 2780.45 (1241.46 to 4415.93) | 6.33 (2.85 to 10) | 76914.95 (36509.87 to 120391.49) | 183.62 (86.53 to 286.3) |
| Tajikistan | 308.5 (125.25 to 562.28) | 8.27 (3.17 to 15.68) | 7195.5 (3071.76 to 12464.29) | 154.74 (65.3 to 275.42) |
| Thailand | 5775.42 (2417.86 to 10085.3) | 5.31 (2.22 to 9.3) | 144394.77 (61437.57 to 236904.29) | 133.05 (57.14 to 218.09) |
| Timor-Leste | 24.55 (8.93 to 45.43) | 3.43 (1.06 to 6.67) | 691.89 (279.4 to 1211.1) | 84.59 (31.94 to 146.03) |
| Togo | 129.04 (47.57 to 222.14) | 5.04 (1.67 to 9.32) | 3447.29 (1378.64 to 5671.76) | 105.04 (41.87 to 176.78) |
| Tokelau | 0.21 (0.08 to 0.35) | 14.13 (5.53 to 23.23) | 6.32 (2.64 to 10.19) | 429.87 (180.32 to 690.73) |
| Tonga | 12.59 (5.23 to 20.58) | 16.25 (6.74 to 26.68) | 386.67 (170.67 to 612.98) | 474.76 (209.69 to 751.52) |
| Trinidad and Tobago | 380.99 (165.92 to 637.92) | 19.84 (8.57 to 32.82) | 11238.12 (5038.08 to 18162.3) | 571.96 (256.43 to 922.18) |
| Tunisia | 1100.5 (384.04 to 2001.95) | 9.7 (3.27 to 18.34) | 26305.27 (10587.17 to 44665.46) | 210.32 (83.91 to 357.41) |
| Turkey | 10228.55 (4235.53 to 17272.31) | 12.38 (5.05 to 21.05) | 235797.59 (103885.83 to 382632.42) | 262.48 (115.83 to 429.58) |
| Turkmenistan | 373.55 (144.87 to 666.17) | 12.07 (4.63 to 21.99) | 8196.82 (3282.39 to 14107.16) | 231.67 (91.7 to 400.73) |
| Tuvalu | 1.63 (0.65 to 2.65) | 17.3 (6.78 to 28.31) | 50.23 (19.77 to 78.41) | 473.31 (186.61 to 741.29) |
| Uganda | 443.79 (157.66 to 818.46) | 4.13 (1.44 to 7.86) | 11415.11 (4186.33 to 20296.08) | 86.56 (31.34 to 156.88) |
| Ukraine | 7259.34 (2226.73 to 14251.97) | 8.99 (2.78 to 17.72) | 126729.09 (45578.43 to 229139.33) | 157.94 (55.69 to 279.18) |
| United Arab Emirates | 278.84 (109.37 to 449.47) | 16.87 (6.64 to 28.59) | 14549.87 (6273.5 to 23198.02) | 385.35 (161.47 to 636.56) |
| United Kingdom | 11413.81 (4999.1 to 18104.54) | 7.53 (3.4 to 11.77) | 254961.88 (114916.61 to 387104.41) | 199.1 (92.05 to 304.15) |
| United Republic of Tanzania | 337.8 (117.71 to 631.28) | 1.71 (0.58 to 3.32) | 8529.02 (3363.15 to 15591.4) | 36.61 (13.9 to 67.39) |
| United States of America | 32004.35 (12236.81 to 52467.43) | 4.99 (1.95 to 8.11) | 808429.91 (334151.77 to 1297427.1) | 136.85 (57.7 to 218.16) |
| United States Virgin Islands | 11.91 (4.87 to 20.2) | 6.85 (2.66 to 11.92) | 333.15 (146.12 to 534.24) | 184.12 (80.38 to 292.87) |
| Uruguay | 310.13 (123.35 to 555.51) | 4.9 (2.09 to 8.38) | 6957.6 (3007.59 to 11281.91) | 125.67 (55.89 to 202.82) |
| Uzbekistan | 1091.77 (450.68 to 1967.51) | 5.71 (2.11 to 10.79) | 27649.8 (12187.88 to 46039.78) | 118.28 (49.91 to 201.57) |
| Vanuatu | 7.44 (3.02 to 12.8) | 5.98 (2.44 to 10.55) | 214.44 (87.14 to 374.13) | 135.52 (55.4 to 229.25) |
| Venezuela (Bolivarian Republic of) | 1772.65 (740.72 to 3023.74) | 6.36 (2.64 to 11.05) | 45289.1 (19214.23 to 74921.19) | 153.23 (65.81 to 254.47) |
| Viet Nam | 4928.81 (1807.23 to 9166.1) | 5.81 (2 to 11.04) | 130669.12 (52421.1 to 223102.39) | 137.19 (54.18 to 236.65) |
| Yemen | 1944.57 (810.02 to 3326.21) | 17.19 (6.92 to 29.91) | 55988.52 (24335.91 to 91036.45) | 400.03 (170.02 to 668.81) |
| Zambia | 309.9 (116.62 to 543.64) | 5.88 (2.14 to 10.85) | 9110.8 (3563.61 to 15917.36) | 139.22 (54.79 to 242.57) |
| Zimbabwe | 487.99 (194.34 to 826.88) | 9.92 (3.57 to 17.4) | 13131.82 (5282.04 to 22347.76) | 214.46 (87.39 to 354.95) |

# 3.The percentage change of 204 countries or territories from 1990-2021(Table S3).

Table S3 Percent change in death and DALYs of low physical activities across 204 countries or territories.

| Location name | Death, number | ASMR | DALYs, number | ASDR |
| --- | --- | --- | --- | --- |
| Afghanistan | 0.36 (-0.01 to 0.92) | 0.03 (-0.25 to 0.44) | 0.69 (0.22 to 1.34) | 0.15 (-0.16 to 0.59) |
| Albania | 1.51 (0.55 to 2.76) | -0.02 (-0.41 to 0.56) | 1.31 (0.63 to 2.31) | -0.03 (-0.34 to 0.39) |
| Algeria | 1.77 (0.9 to 2.78) | -0.16 (-0.46 to 0.24) | 2.02 (1.31 to 2.91) | -0.04 (-0.3 to 0.28) |
| American Samoa | 1.76 (1.11 to 2.61) | 0.24 (-0.05 to 0.65) | 1.8 (1.19 to 2.55) | 0.38 (0.09 to 0.73) |
| Andorra | 1.21 (0.37 to 2.8) | -0.4 (-0.63 to 0.03) | 1.13 (0.42 to 2.31) | -0.28 (-0.52 to 0.11) |
| Angola | 2.11 (1.04 to 3.64) | 0.05 (-0.31 to 0.56) | 2.28 (1.08 to 3.82) | 0.07 (-0.28 to 0.54) |
| Antigua and Barbuda | 0.41 (0.01 to 1.02) | -0.12 (-0.37 to 0.23) | 0.85 (0.41 to 1.45) | -0.02 (-0.26 to 0.29) |
| Argentina | 0.22 (-0.22 to 0.96) | -0.39 (-0.62 to -0.01) | 0.31 (-0.08 to 0.94) | -0.28 (-0.5 to 0.08) |
| Armenia | 0.54 (-0.02 to 1.38) | -0.22 (-0.49 to 0.22) | 0.46 (0.01 to 1.05) | -0.19 (-0.42 to 0.14) |
| Australia | 0.17 (-0.15 to 0.66) | -0.58 (-0.69 to -0.38) | 0.29 (0.02 to 0.65) | -0.45 (-0.57 to -0.28) |
| Austria | -0.15 (-0.47 to 0.41) | -0.54 (-0.71 to -0.25) | -0.16 (-0.42 to 0.22) | -0.49 (-0.64 to -0.26) |
| Azerbaijan | 0.79 (0.13 to 1.82) | -0.04 (-0.43 to 0.53) | 0.98 (0.33 to 1.93) | 0.02 (-0.33 to 0.53) |
| Bahamas | 1.06 (0.44 to 1.95) | -0.2 (-0.45 to 0.19) | 1.42 (0.76 to 2.23) | -0.08 (-0.33 to 0.24) |
| Bahrain | 2.66 (1.82 to 3.81) | -0.18 (-0.39 to 0.1) | 3.48 (2.49 to 4.69) | -0.13 (-0.31 to 0.11) |
| Bangladesh | 2.2 (1.19 to 3.58) | 0.11 (-0.26 to 0.58) | 2.24 (1.29 to 3.5) | 0.1 (-0.22 to 0.53) |
| Barbados | 0.35 (-0.01 to 0.83) | -0.21 (-0.41 to 0.07) | 0.56 (0.21 to 1) | -0.11 (-0.3 to 0.11) |
| Belarus | 0.31 (-0.21 to 1.19) | -0.04 (-0.41 to 0.58) | 0.23 (-0.17 to 0.83) | -0.06 (-0.35 to 0.41) |
| Belgium | -0.3 (-0.53 to 0.06) | -0.63 (-0.74 to -0.43) | -0.19 (-0.4 to 0.11) | -0.49 (-0.62 to -0.3) |
| Belize | 1.94 (1.11 to 3.17) | 0.01 (-0.27 to 0.43) | 2.77 (1.86 to 4) | 0.17 (-0.11 to 0.54) |
| Benin | 1.62 (0.62 to 3.31) | 0.16 (-0.32 to 0.93) | 1.91 (0.88 to 3.38) | 0.19 (-0.22 to 0.84) |
| Bermuda | 0.23 (-0.19 to 0.8) | -0.56 (-0.71 to -0.34) | 0.32 (-0.04 to 0.82) | -0.44 (-0.58 to -0.22) |
| Bhutan | 1.92 (1.14 to 3.04) | 0.04 (-0.24 to 0.42) | 1.55 (0.94 to 2.41) | 0.03 (-0.21 to 0.37) |
| Bolivia (Plurinational State of) | 1.75 (0.85 to 3.35) | -0.07 (-0.38 to 0.52) | 1.91 (1.01 to 3.4) | 0 (-0.31 to 0.51) |
| Bosnia and Herzegovina | 0.99 (0.33 to 1.85) | 0.01 (-0.32 to 0.5) | 0.79 (0.28 to 1.47) | 0.05 (-0.24 to 0.46) |
| Botswana | 1.48 (0.75 to 2.7) | -0.05 (-0.33 to 0.39) | 1.64 (0.92 to 2.77) | 0.01 (-0.25 to 0.43) |
| Brazil | 1.14 (0.67 to 1.82) | -0.36 (-0.52 to -0.11) | 1.23 (0.8 to 1.81) | -0.26 (-0.4 to -0.04) |
| Brunei Darussalam | 0.92 (0.42 to 1.68) | -0.36 (-0.55 to -0.11) | 1.7 (0.99 to 2.76) | -0.22 (-0.42 to 0.05) |
| Bulgaria | 0.27 (-0.28 to 0.96) | -0.24 (-0.53 to 0.24) | 0.19 (-0.17 to 0.69) | -0.11 (-0.38 to 0.27) |
| Burkina Faso | 1.2 (0.43 to 2.27) | 0.04 (-0.36 to 0.6) | 1.3 (0.56 to 2.32) | 0.08 (-0.27 to 0.53) |
| Burundi | 0.37 (-0.14 to 1.13) | -0.23 (-0.54 to 0.23) | 0.48 (-0.07 to 1.24) | -0.25 (-0.53 to 0.11) |
| Cabo Verde | 2.56 (1.09 to 5.27) | 1.07 (0.23 to 2.63) | 2.4 (1.31 to 4.13) | 0.81 (0.23 to 1.77) |
| Cambodia | 1.9 (0.68 to 3.8) | 0.06 (-0.44 to 0.93) | 1.97 (0.73 to 3.7) | 0.1 (-0.34 to 0.79) |
| Cameroon | 2.47 (1.28 to 4.26) | 0.27 (-0.15 to 1.02) | 2.73 (1.48 to 4.49) | 0.3 (-0.11 to 0.92) |
| Canada | 0.35 (-0.28 to 1.48) | -0.5 (-0.73 to -0.07) | 0.67 (0.02 to 1.67) | -0.29 (-0.56 to 0.11) |
| Central African Republic | 0.76 (0.15 to 1.69) | -0.04 (-0.39 to 0.51) | 0.98 (0.31 to 1.96) | 0.01 (-0.31 to 0.48) |
| Chad | 1.3 (0.51 to 2.6) | 0.24 (-0.21 to 0.99) | 1.63 (0.79 to 2.89) | 0.29 (-0.13 to 0.92) |
| Chile | 0.71 (0.08 to 1.78) | -0.43 (-0.65 to -0.05) | 1.06 (0.46 to 2.07) | -0.23 (-0.46 to 0.16) |
| China | 2.1 (1.02 to 3.41) | -0.01 (-0.35 to 0.45) | 1.67 (0.92 to 2.66) | -0.02 (-0.28 to 0.32) |
| Colombia | 1.34 (0.69 to 2.49) | -0.34 (-0.53 to -0.02) | 1.66 (1.05 to 2.55) | -0.14 (-0.34 to 0.16) |
| Comoros | 1.56 (0.57 to 3.06) | -0.01 (-0.38 to 0.66) | 1.61 (0.59 to 3.1) | 0.03 (-0.35 to 0.58) |
| Congo | 1.25 (0.45 to 2.5) | -0.07 (-0.4 to 0.48) | 1.48 (0.6 to 2.85) | -0.04 (-0.36 to 0.46) |
| Cook Islands | 0.8 (0.25 to 1.5) | -0.22 (-0.45 to 0.1) | 0.83 (0.32 to 1.47) | -0.08 (-0.31 to 0.22) |
| Costa Rica | 2.28 (1.12 to 4) | -0.04 (-0.38 to 0.47) | 2.64 (1.6 to 4.07) | 0.13 (-0.19 to 0.6) |
| Croatia | 0.21 (-0.19 to 0.81) | -0.41 (-0.61 to -0.07) | 0.15 (-0.16 to 0.62) | -0.37 (-0.54 to -0.11) |
| Cuba | 0.46 (-0.03 to 1.19) | -0.34 (-0.56 to 0.01) | 0.59 (0.15 to 1.11) | -0.19 (-0.41 to 0.08) |
| Cyprus | 0.22 (-0.19 to 0.91) | -0.63 (-0.77 to -0.35) | 0.35 (-0.02 to 0.86) | -0.56 (-0.7 to -0.33) |
| Czechia | -0.07 (-0.37 to 0.64) | -0.48 (-0.65 to -0.04) | -0.04 (-0.29 to 0.48) | -0.42 (-0.57 to -0.09) |
| CotedfIvoire | 2.26 (1.16 to 3.88) | 0.12 (-0.29 to 0.74) | 2.37 (1.32 to 3.9) | 0.17 (-0.21 to 0.71) |
| Democratic People's Republic of Korea | 1.37 (0.58 to 2.63) | -0.02 (-0.37 to 0.55) | 1.29 (0.62 to 2.35) | 0.05 (-0.26 to 0.53) |
| Democratic Republic of the Congo | 1.18 (0.49 to 2.14) | -0.08 (-0.38 to 0.36) | 1.27 (0.53 to 2.27) | -0.04 (-0.32 to 0.35) |
| Denmark | -0.24 (-0.5 to 0.17) | -0.52 (-0.68 to -0.27) | -0.2 (-0.42 to 0.12) | -0.47 (-0.61 to -0.26) |
| Djibouti | 4.89 (2.69 to 8.73) | 0.25 (-0.24 to 1.15) | 4.91 (2.72 to 8.39) | 0.24 (-0.2 to 0.98) |
| Dominica | 0.23 (-0.15 to 0.94) | -0.06 (-0.36 to 0.53) | 0.35 (-0.03 to 1.03) | 0 (-0.29 to 0.52) |
| Dominican Republic | 2.37 (1.17 to 4.12) | 0.03 (-0.35 to 0.63) | 2.7 (1.65 to 4.07) | 0.3 (-0.07 to 0.8) |
| Ecuador | 2.42 (1.13 to 4.55) | 0.05 (-0.36 to 0.75) | 2.75 (1.46 to 4.45) | 0.2 (-0.21 to 0.8) |
| Egypt | 1.24 (0.67 to 2) | -0.03 (-0.3 to 0.37) | 1.41 (0.79 to 2.2) | 0.04 (-0.22 to 0.37) |
| El Salvador | 2.45 (1.25 to 4.47) | 0.48 (-0.04 to 1.38) | 2.36 (1.33 to 3.99) | 0.58 (0.1 to 1.37) |
| Equatorial Guinea | 2.01 (0.76 to 3.89) | 0.21 (-0.28 to 1.03) | 2.17 (0.99 to 3.9) | 0.2 (-0.25 to 0.87) |
| Eritrea | 1.85 (0.79 to 3.78) | 0.13 (-0.32 to 0.96) | 1.74 (0.68 to 3.65) | 0.1 (-0.3 to 0.77) |
| Estonia | -0.32 (-0.57 to 0.12) | -0.62 (-0.76 to -0.37) | -0.3 (-0.53 to 0.03) | -0.54 (-0.68 to -0.31) |
| Eswatini | 1.76 (0.75 to 3.15) | 0.4 (-0.1 to 1.1) | 2.01 (0.99 to 3.42) | 0.49 (0 to 1.15) |
| Ethiopia | 0.62 (0.1 to 1.39) | -0.29 (-0.51 to 0.05) | 0.57 (0.08 to 1.32) | -0.29 (-0.5 to 0.01) |
| Fiji | 1.86 (1 to 3.16) | 0.38 (-0.06 to 1.11) | 1.73 (0.94 to 2.92) | 0.33 (-0.05 to 0.9) |
| Finland | -0.04 (-0.42 to 0.62) | -0.57 (-0.74 to -0.28) | -0.01 (-0.31 to 0.45) | -0.47 (-0.63 to -0.24) |
| France | 0.07 (-0.29 to 0.65) | -0.5 (-0.66 to -0.24) | 0.09 (-0.19 to 0.48) | -0.39 (-0.53 to -0.18) |
| Gabon | 0.83 (0.13 to 2) | 0.15 (-0.33 to 1.01) | 1.03 (0.35 to 2.14) | 0.16 (-0.25 to 0.82) |
| Gambia | 3.05 (1.61 to 5.33) | 0.36 (-0.15 to 1.24) | 2.97 (1.68 to 5.08) | 0.39 (-0.08 to 1.15) |
| Georgia | -0.19 (-0.64 to 0.21) | -0.33 (-0.66 to 0.01) | -0.11 (-0.41 to 0.29) | -0.17 (-0.44 to 0.18) |
| Germany | -0.26 (-0.56 to 0.22) | -0.6 (-0.75 to -0.33) | -0.22 (-0.48 to 0.14) | -0.51 (-0.66 to -0.29) |
| Ghana | 2.02 (1.06 to 3.57) | 0.14 (-0.24 to 0.8) | 2.1 (1.23 to 3.51) | 0.15 (-0.19 to 0.68) |
| Greece | 0.27 (-0.24 to 1.38) | -0.46 (-0.67 to 0.11) | 0.19 (-0.15 to 0.77) | -0.36 (-0.55 to 0.08) |
| Greenland | -0.01 (-0.32 to 0.62) | -0.58 (-0.72 to -0.24) | 0.12 (-0.22 to 0.69) | -0.51 (-0.65 to -0.22) |
| Grenada | 0.05 (-0.24 to 0.6) | -0.1 (-0.36 to 0.33) | 0.37 (0.02 to 0.87) | -0.07 (-0.31 to 0.28) |
| Guam | 0.75 (0.21 to 1.53) | -0.61 (-0.72 to -0.39) | 1.12 (0.5 to 1.98) | -0.34 (-0.52 to -0.07) |
| Guatemala | 5.11 (2.82 to 8.74) | 0.39 (-0.2 to 1.44) | 5.34 (3.12 to 8.57) | 0.7 (0.11 to 1.63) |
| Guinea | 0.98 (0.31 to 2.41) | 0.23 (-0.21 to 1.1) | 1.07 (0.39 to 2.42) | 0.23 (-0.16 to 1.03) |
| Guinea-Bissau | 0.9 (0.26 to 1.76) | 0.16 (-0.25 to 0.77) | 1.08 (0.45 to 1.97) | 0.15 (-0.21 to 0.64) |
| Guyana | 0.54 (0.08 to 1.19) | -0.08 (-0.37 to 0.31) | 0.76 (0.25 to 1.4) | 0.02 (-0.25 to 0.38) |
| Haiti | 0.94 (0.22 to 1.84) | -0.13 (-0.46 to 0.33) | 1.15 (0.39 to 2.17) | -0.05 (-0.38 to 0.37) |
| Honduras | 4.14 (2.37 to 6.69) | 0.66 (0.04 to 1.65) | 4.03 (2.58 to 6.14) | 0.64 (0.15 to 1.32) |
| Hungary | 0.02 (-0.32 to 0.56) | -0.37 (-0.58 to 0.05) | -0.02 (-0.29 to 0.34) | -0.32 (-0.5 to -0.03) |
| Iceland | 0.12 (-0.34 to 0.91) | -0.5 (-0.7 to -0.16) | 0.27 (-0.1 to 0.87) | -0.38 (-0.55 to -0.11) |
| India | 2.2 (1.46 to 3.13) | 0.13 (-0.15 to 0.48) | 1.86 (1.24 to 2.62) | 0.08 (-0.16 to 0.36) |
| Indonesia | 2.25 (1.46 to 3.2) | 0.4 (0.05 to 0.83) | 2.19 (1.47 to 3.07) | 0.32 (0.03 to 0.68) |
| Iran (Islamic Republic of) | 1.38 (0.83 to 2.17) | -0.32 (-0.5 to -0.05) | 1.45 (0.92 to 2.08) | -0.21 (-0.37 to 0.01) |
| Iraq | 1.62 (0.83 to 2.63) | 0.02 (-0.3 to 0.44) | 2.1 (1.33 to 3.16) | 0.03 (-0.23 to 0.37) |
| Ireland | -0.24 (-0.5 to 0.09) | -0.66 (-0.77 to -0.49) | -0.17 (-0.39 to 0.11) | -0.58(-0.69 to -0.44) |
| Israel | 0.57 (0.03 to 1.32) | -0.5 (-0.67 to -0.26) | 0.57 (0.16 to 1.12) | -0.42 (-0.57 to -0.22) |
| Italy | 0.08 (-0.23 to 0.6) | -0.52 (-0.65 to -0.26) | 0 (-0.24 to 0.33) | -0.45 (-0.57 to -0.24) |
| Jamaica | 0.65 (0.2 to 1.24) | -0.06 (-0.31 to 0.29) | 0.74 (0.33 to 1.27) | 0.01 (-0.23 to 0.32) |
| Japan | 0.53 (0.02 to 1.31) | -0.51 (-0.65 to -0.18) | 0.48 (0.11 to 0.96) | -0.25 (-0.44 to 0.05) |
| Jordan | 2.28 (1.39 to 3.53) | -0.38 (-0.56 to -0.13) | 3.11 (1.99 to 4.53) | -0.28 (-0.46 to -0.04) |
| Kazakhstan | 0.09 (-0.28 to 0.71) | -0.14 (-0.47 to 0.41) | 0.2 (-0.15 to 0.73) | -0.13 (-0.38 to 0.27) |
| Kenya | 2.71 (1.59 to 4.28) | 0.43 (-0.06 to 1.04) | 2.79 (1.72 to 4.2) | 0.37 (0 to 0.88) |
| Kiribati | 1.36 (0.72 to 2.38) | 0.24 (-0.1 to 0.76) | 1.5 (0.87 to 2.49) | 0.25 (-0.06 to 0.75) |
| Kuwait | 2.21 (1.47 to 3.2) | -0.35 (-0.5 to -0.13) | 3.5 (2.64 to 4.66) | -0.12 (-0.28 to 0.1) |
| Kyrgyzstan | 0.26 (-0.2 to 1.07) | -0.09 (-0.45 to 0.56) | 0.36 (-0.07 to 0.95) | -0.09 (-0.38 to 0.3) |
| Lao People's Democratic Republic | 0.72 (0.05 to 1.71) | -0.2 (-0.52 to 0.31) | 0.8 (0.12 to 1.81) | -0.16 (-0.47 to 0.29) |
| Latvia | -0.14 (-0.48 to 0.34) | -0.35 (-0.57 to 0) | -0.17 (-0.42 to 0.17) | -0.28 (-0.48 to 0.01) |
| Lebanon | 1.05 (0.42 to 2.08) | -0.43 (-0.6 to -0.13) | 1.1 (0.56 to 1.84) | -0.28 (-0.46 to -0.01) |
| Lesotho | 1.1 (0.23 to 2.69) | 0.88 (0.14 to 2.25) | 1.31 (0.41 to 2.93) | 0.94 (0.19 to 2.22) |
| Liberia | 1.1 (0.49 to 2.02) | 0.21 (-0.16 to 0.78) | 1.48 (0.8 to 2.41) | 0.27 (-0.07 to 0.76) |
| Libya | 2.28 (1.35 to 3.55) | 0.23 (-0.13 to 0.72) | 3.02 (1.96 to 4.3) | 0.4 (0.02 to 0.84) |
| Lithuania | 0.17 (-0.25 to 0.82) | -0.27 (-0.52 to 0.11) | 0.12 (-0.22 to 0.56) | -0.21 (-0.44 to 0.09) |
| Luxembourg | -0.17 (-0.48 to 0.37) | -0.64 (-0.78 to -0.39) | -0.1 (-0.37 to 0.28) | -0.56 (-0.7 to -0.37) |
| Madagascar | 0.98 (0.28 to 2.11) | 0.05 (-0.35 to 0.67) | 1.24 (0.45 to 2.42) | 0.05 (-0.29 to 0.6) |
| Malawi | 1.23 (0.39 to 2.43) | 0.15 (-0.27 to 0.81) | 1.24 (0.44 to 2.4) | 0.16 (-0.25 to 0.77) |
| Malaysia | 1.82 (1.08 to 2.8) | -0.08 (-0.34 to 0.27) | 2.22 (1.45 to 3.17) | 0.03 (-0.22 to 0.35) |
| Maldives | 0.68 (0.21 to 1.18) | -0.53 (-0.65 to -0.39) | 0.72 (0.35 to 1.14) | -0.51 (-0.61 to -0.39) |
| Mali | 1.41 (0.67 to 2.44) | 0.08 (-0.27 to 0.59) | 1.71 (0.93 to 2.84) | 0.2 (-0.13 to 0.67) |
| Malta | 0.31 (-0.1 to 0.9) | -0.55 (-0.69 to -0.33) | 0.39 (0.03 to 0.84) | -0.42 (-0.57 to -0.23) |
| Marshall Islands | 1.83 (1.04 to 2.78) | 0.28 (-0.05 to 0.68) | 2.24 (1.45 to 3.15) | 0.39 (0.06 to 0.75) |
| Mauritania | 1.02 (0.45 to 1.8) | -0.04 (-0.33 to 0.35) | 1.07 (0.55 to 1.8) | -0.05 (-0.29 to 0.28) |
| Mauritius | 2.34 (1.38 to 3.65) | 0.18 (-0.19 to 0.82) | 2.23 (1.31 to 3.47) | 0.23 (-0.12 to 0.7) |
| Mexico | 2.02 (1.18 to 3.34) | -0.1 (-0.37 to 0.33) | 2.13 (1.31 to 3.31) | 0 (-0.27 to 0.38) |
| Micronesia (Federated States of) | 0.69 (0.21 to 1.26) | 0.12 (-0.19 to 0.49) | 0.92 (0.42 to 1.52) | 0.18 (-0.11 to 0.52) |
| Monaco | 0.02 (-0.38 to 1.09) | -0.3 (-0.56 to 0.41) | 0.1 (-0.24 to 0.82) | -0.2 (-0.43 to 0.25) |
| Mongolia | 0.59 (-0.11 to 1.72) | -0.15 (-0.58 to 0.58) | 0.95 (0.23 to 1.92) | -0.08 (-0.43 to 0.43) |
| Montenegro | 1.32 (0.53 to 2.47) | 0.56 (-0.02 to 1.38) | 1.16 (0.56 to 2.02) | 0.39 (-0.01 to 0.95) |
| Morocco | 1.55 (0.82 to 2.54) | 0.08 (-0.24 to 0.5) | 1.89 (1.18 to 2.93) | 0.2 (-0.1 to 0.62) |
| Mozambique | 1.36 (0.48 to 2.7) | 0.31 (-0.21 to 1.08) | 1.51 (0.59 to 2.86) | 0.34 (-0.14 to 1.05) |
| Myanmar | 1 (0.08 to 2.17) | -0.07 (-0.49 to 0.55) | 1.08 (0.21 to 2.31) | -0.01 (-0.42 to 0.54) |
| Namibia | 1.45 (0.6 to 2.45) | 0.14 (-0.25 to 0.69) | 1.44 (0.65 to 2.36) | 0.15 (-0.22 to 0.59) |
| Nauru | 0.59 (0.06 to 1.34) | 0.28 (-0.14 to 0.86) | 0.6 (0.13 to 1.35) | 0.3 (-0.1 to 0.85) |
| Nepal | 1.97 (0.82 to 3.63) | 0.12 (-0.31 to 0.76) | 1.94 (0.88 to 3.45) | 0.14 (-0.26 to 0.73) |
| Netherlands | -0.01 (-0.38 to 0.53) | -0.5 (-0.68 to -0.23) | 0.01 (-0.27 to 0.43) | -0.44 (-0.6 to -0.22) |
| New Zealand | 0.37 (-0.05 to 1.03) | -0.44 (-0.61 to -0.16) | 0.49 (0.11 to 1.02) | -0.32 (-0.49 to -0.08) |
| Nicaragua | 2.71 (1.37 to 4.64) | 0.13 (-0.3 to 0.79) | 3.15 (1.9 to 4.99) | 0.28 (-0.11 to 0.83) |
| Niger | 2.35 (1.15 to 4.01) | 0.1 (-0.29 to 0.69) | 2.45 (1.38 to 4.04) | 0.15 (-0.22 to 0.64) |
| Nigeria | 0.9 (0.24 to 1.86) | -0.02 (-0.39 to 0.51) | 1.1 (0.47 to 2.05) | 0.01 (-0.31 to 0.48) |
| Niue | 0.16 (-0.24 to 0.77) | 0.29 (-0.14 to 0.92) | 0.32 (-0.07 to 0.88) | 0.34 (-0.05 to 0.86) |
| North Macedonia | 0.87 (0.22 to 1.71) | 0.22 (-0.31 to 0.81) | 0.84 (0.31 to 1.64) | 0.08 (-0.24 to 0.54) |
| Northern Mariana Islands | 2.09 (1.21 to 3.37) | -0.06 (-0.35 to 0.39) | 1.84 (1.05 to 2.93) | 0.03 (-0.24 to 0.41) |
| Norway | -0.29 (-0.52 to 0.16) | -0.55 (-0.69 to -0.28) | -0.24 (-0.43 to 0.08) | -0.48 (-0.61 to -0.29) |
| Oman | 1.06 (0.45 to 1.99) | -0.16 (-0.41 to 0.23) | 1.53 (0.79 to 2.52) | -0.15 (-0.39 to 0.18) |
| Pakistan | 1.76 (1 to 2.91) | 0.39 (-0.01 to 0.98) | 2.11 (1.27 to 3.3) | 0.44 (0.06 to 0.95) |
| Palau | 1.38 (0.57 to 2.56) | 0.11 (-0.27 to 0.64) | 1.62 (0.82 to 2.72) | 0.13 (-0.21 to 0.59) |
| Palestine | 0.98 (0.49 to 1.74) | -0.22 (-0.43 to 0.1) | 1.42 (0.85 to 2.28) | -0.16 (-0.36 to 0.13) |
| Panama | 2.32 (1.04 to 4.22) | -0.01 (-0.38 to 0.57) | 2.57 (1.47 to 4.03) | 0.17 (-0.2 to 0.66) |
| Papua New Guinea | 1.76 (0.66 to 3.44) | -0.01 (-0.38 to 0.63) | 2.14 (1.02 to 3.89) | 0.08 (-0.29 to 0.65) |
| Paraguay | 2.47 (1.1 to 4.66) | 0.29 (-0.23 to 1.19) | 2.7 (1.4 to 4.47) | 0.38 (-0.1 to 1.07) |
| Peru | 1.78 (0.76 to 3.26) | -0.11 (-0.44 to 0.37) | 1.99 (1.08 to 3.31) | 0.02 (-0.29 to 0.49) |
| Philippines | 2.58 (1.41 to 4.04) | 0.1 (-0.31 to 0.68) | 2.69 (1.58 to 3.97) | 0.24 (-0.14 to 0.71) |
| Poland | 0.17 (-0.19 to 0.77) | -0.4 (-0.59 to -0.04) | 0.15 (-0.13 to 0.58) | -0.34 (-0.5 to -0.09) |
| Portugal | -0.01 (-0.35 to 0.76) | -0.6 (-0.75 to -0.12) | 0.01 (-0.26 to 0.52) | -0.47 (-0.63 to -0.08) |
| Puerto Rico | 0.41 (-0.04 to 1) | -0.46 (-0.63 to -0.23) | 0.58 (0.17 to 1.09) | -0.22 (-0.43 to 0.03) |
| Qatar | 3.79 (2.36 to 5.82) | -0.36 (-0.55 to -0.08) | 6.44 (4.39 to 9.02) | -0.23 (-0.42 to 0.04) |
| Republic of Korea | 0.9 (0.31 to 1.77) | -0.55 (-0.71 to -0.21) | 1.16 (0.6 to 1.96) | -0.35 (-0.53 to -0.04) |
| Republic of Moldova | 0.22 (-0.19 to 0.85) | -0.38 (-0.6 to 0.03) | 0.29 (-0.09 to 0.79) | -0.21 (-0.44 to 0.14) |
| Romania | 0.26 (-0.15 to 0.82) | -0.32 (-0.53 to 0.11) | 0.16 (-0.14 to 0.59) | -0.23 (-0.43 to 0.08) |
| Russian Federation | 0.22 (-0.14 to 0.78) | -0.25 (-0.49 to 0.18) | 0.16 (-0.15 to 0.58) | -0.21 (-0.41 to 0.11) |
| Rwanda | 0.52 (-0.07 to 1.4) | -0.26 (-0.56 to 0.22) | 0.47 (-0.11 to 1.34) | -0.31 (-0.56 to 0.07) |
| Saint Kitts and Nevis | -0.06 (-0.31 to 0.33) | -0.35 (-0.54 to -0.07) | 0.23 (-0.1 to 0.69) | -0.28 (-0.45 to -0.01) |
| Saint Lucia | 0.67 (0.18 to 1.39) | -0.46 (-0.62 to -0.18) | 0.91 (0.45 to 1.6) | -0.34 (-0.5 to -0.08) |
| Saint Vincent and the Grenadines | 0.33 (-0.06 to 0.87) | -0.33 (-0.53 to -0.04) | 0.58 (0.17 to 1.16) | -0.21 (-0.42 to 0.1) |
| Samoa | 1.14 (0.61 to 1.92) | 0.21 (-0.11 to 0.68) | 1.32 (0.84 to 2.07) | 0.34 (0.05 to 0.78) |
| San Marino | 0.1 (-0.35 to 0.83) | -0.6 (-0.75 to -0.34) | 0.31 (-0.1 to 0.89) | -0.39 (-0.58 to -0.12) |
| Sao Tome and Principe | 0.87 (0.23 to 2.08) | 0.22 (-0.25 to 1.08) | 1.23 (0.52 to 2.39) | 0.3 (-0.11 to 0.95) |
| Saudi Arabia | 1.99 (1.12 to 3.25) | -0.04 (-0.3 to 0.34) | 3.28 (2.04 to 4.87) | 0.11 (-0.18 to 0.47) |
| Senegal | 1.64 (0.77 to 3.1) | 0.13 (-0.27 to 0.77) | 1.78 (0.94 to 3.11) | 0.16 (-0.18 to 0.72) |
| Serbia | 0.45 (-0.04 to 1.09) | -0.35 (-0.57 to 0.03) | 0.38 (0 to 0.86) | -0.26 (-0.46 to 0.09) |
| Seychelles | 0.82 (0.29 to 1.67) | 0.05 (-0.27 to 0.53) | 1.4 (0.74 to 2.19) | 0.25 (-0.08 to 0.65) |
| Sierra Leone | 0.96 (0.32 to 2.02) | 0.13 (-0.24 to 0.8) | 1.21 (0.52 to 2.26) | 0.19 (-0.17 to 0.77) |
| Singapore | 0.27 (-0.11 to 0.9) | -0.7 (-0.8 to -0.54) | 0.79 (0.31 to 1.5) | -0.54 (-0.66 to -0.35) |
| Slovakia | 0.18 (-0.26 to 0.87) | -0.3 (-0.55 to 0.12) | 0.17 (-0.2 to 0.72) | -0.28 (-0.51 to 0.05) |
| Slovenia | 0.1 (-0.28 to 0.67) | -0.51 (-0.68 to -0.23) | 0.08 (-0.23 to 0.52) | -0.45 (-0.6 to -0.21) |
| Solomon Islands | 2 (0.94 to 3.68) | 0.15 (-0.25 to 0.72) | 2.18 (1.17 to 3.88) | 0.22 (-0.17 to 0.8) |
| Somalia | 1.58 (0.64 to 2.96) | 0.05 (-0.34 to 0.66) | 1.68 (0.75 to 3.17) | 0.05 (-0.32 to 0.59) |
| South Africa | 2.11 (1.58 to 2.71) | 0.45 (0.18 to 0.79) | 2.01 (1.51 to 2.57) | 0.39 (0.17 to 0.63) |
| South Sudan | 0.57 (0 to 1.54) | 0.17 (-0.28 to 0.93) | 0.74 (0.11 to 1.72) | 0.19 (-0.22 to 0.84) |
| Spain | 0.05 (-0.29 to 0.81) | -0.57 (-0.71 to -0.24) | 0.19 (-0.14 to 0.69) | -0.38 (-0.54 to -0.09) |
| Sri Lanka | 2.07 (0.76 to 4.47) | 0.04 (-0.44 to 1.16) | 2.47 (1.24 to 4.55) | 0.28 (-0.17 to 1.13) |
| Sudan | 0.66 (0.23 to 1.3) | -0.21 (-0.41 to 0.1) | 0.84 (0.4 to 1.53) | -0.17 (-0.37 to 0.12) |
| Suriname | 1.25 (0.58 to 2.24) | -0.13 (-0.39 to 0.29) | 1.75 (1.08 to 2.65) | 0.1 (-0.16 to 0.47) |
| Sweden | -0.2 (-0.49 to 0.38) | -0.5 (-0.68 to -0.17) | -0.12 (-0.37 to 0.29) | -0.38 (-0.54 to -0.13) |
| Switzerland | -0.18 (-0.51 to 0.4) | -0.61 (-0.75 to -0.35) | 0.02 (-0.28 to 0.45) | -0.42 (-0.59 to -0.19) |
| Syrian Arab Republic | 1.2 (0.48 to 2.36) | -0.04 (-0.38 to 0.5) | 1.39 (0.65 to 2.45) | -0.01 (-0.29 to 0.43) |
| Taiwan (Province of China) | 1.11 (0.54 to 1.86) | -0.37 (-0.54 to -0.12) | 1.04 (0.61 to 1.65) | -0.24 (-0.39 to -0.01) |
| Tajikistan | 0.41 (-0.09 to 1.16) | -0.12 (-0.43 to 0.36) | 0.68 (0.14 to 1.35) | -0.1 (-0.39 to 0.28) |
| Thailand | 2.22 (1.19 to 3.89) | -0.21 (-0.47 to 0.22) | 2.3 (1.35 to 3.77) | -0.04 (-0.31 to 0.39) |
| Timor-Leste | 2.93 (1.29 to 5.71) | 0.07 (-0.4 to 0.84) | 2.86 (1.41 to 5.26) | 0.2 (-0.25 to 0.94) |
| Togo | 2.45 (1.17 to 4.46) | 0.22 (-0.27 to 1.01) | 2.6 (1.28 to 4.46) | 0.2 (-0.22 to 0.83) |
| Tokelau | 0.16 (-0.22 to 0.73) | 0 (-0.31 to 0.53) | 0.22 (-0.11 to 0.79) | 0.1 (-0.19 to 0.61) |
| Tonga | 0.8 (0.23 to 1.56) | 0.18 (-0.19 to 0.69) | 0.74 (0.26 to 1.42) | 0.23 (-0.1 to 0.67) |
| Trinidad and Tobago | 0.78 (0.27 to 1.51) | -0.31 (-0.52 to 0) | 0.94 (0.48 to 1.53) | -0.19 (-0.38 to 0.06) |
| Tunisia | 1.93 (0.88 to 3.51) | -0.1 (-0.45 to 0.41) | 2.2 (1.25 to 3.53) | 0.08 (-0.24 to 0.57) |
| Turkey | 1.19 (0.61 to 2) | -0.27 (-0.47 to 0) | 1.27 (0.69 to 1.95) | -0.21 (-0.41 to 0.04) |
| Turkmenistan | 1.25 (0.46 to 2.42) | 0.04 (-0.35 to 0.68) | 1.41 (0.63 to 2.48) | 0.13 (-0.25 to 0.65) |
| Tuvalu | 0.64 (0.18 to 1.21) | 0.02 (-0.28 to 0.4) | 0.64 (0.19 to 1.17) | 0.06 (-0.22 to 0.39) |
| Uganda | 1.41 (0.52 to 3.09) | 0.12 (-0.32 to 0.89) | 1.5 (0.62 to 2.87) | 0.11 (-0.28 to 0.82) |
| Ukraine | 0.12 (-0.38 to 1.17) | -0.11 (-0.52 to 0.78) | 0.04 (-0.34 to 0.69) | -0.11 (-0.44 to 0.46) |
| United Arab Emirates | 3.43 (2.29 to 5.03) | -0.17 (-0.39 to 0.18) | 5.9 (4.01 to 8.57) | -0.19 (-0.39 to 0.09) |
| United Kingdom | -0.44 (-0.55 to -0.3) | -0.65 (-0.71 to -0.56) | ’-0.33 (-0.45 to -0.18) | -0.52 (-0.6 to -0.41) |
| United Republic of Tanzania | 1.71 (0.57 to 3.53) | 0.14 (-0.37 to 1) | 1.66 (0.66 to 3.26) | 0.14 (-0.28 to 0.83) |
| United States of America | 0.23 (-0.17 to 0.87) | -0.35 (-0.56 to -0.02) | 0.65 (0.23 to 1.23) | -0.08 (-0.3 to 0.23) |
| United States Virgin Islands | 0.58 (0.06 to 1.41) | -0.46 (-0.65 to -0.13) | 0.82 (0.32 to 1.48) | -0.26 (-0.47 to 0.03) |
| Uruguay | 0.14 (-0.27 to 0.81) | -0.3 (-0.55 to 0.12) | 0.17 (-0.18 to 0.65) | -0.17 (-0.42 to 0.15) |
| Uzbekistan | 1.13 (0.28 to 2.68) | 0.13 (-0.36 to 0.98) | 1.6 (0.69 to 3.03) | 0.21 (-0.22 to 0.89) |
| Vanuatu | 2.13 (0.94 to 4.2) | 0.1 (-0.35 to 0.97) | 2.22 (1.02 to 4.43) | 0.15 (-0.28 to 0.85) |
| Venezuela (Bolivarian Republic of) | 2.71 (1.4 to 4.65) | 0.11 (-0.29 to 0.76) | 2.72 (1.59 to 4.26) | 0.17 (-0.2 to 0.69) |
| Viet Nam | 1.84 (0.8 to 3.71) | 0.2 (-0.26 to 1.07) | 2.15 (1.12 to 3.9) | 0.28 (-0.13 to 0.97) |
| Yemen | 1.66 (0.86 to 2.93) | -0.1 (-0.38 to 0.32) | 1.82 (1.04 to 3.2) | -0.05 (-0.3 to 0.37) |
| Zambia | 1.66 (0.74 to 2.98) | 0.14 (-0.27 to 0.74) | 1.85 (0.92 to 3.22) | 0.16 (-0.22 to 0.72) |
| Zimbabwe | 1.6 (0.69 to 2.93) | 0.53 (-0.05 to 1.35) | 1.89 (0.94 to 3.35) | 0.65 (0.11 to 1.39) |
